# Supplementary material
Source: Springer Nature journal article supplement (https://www.springermedizin.de/resource/supplementary/13256_2012_2438_MOESM1_ESM.pdf/9650256)

LL:363.28mm(331.63)  
19568: 2:19  
336.50mm  
0.00  
(233,256)

2008.05.29 0:28:25.757  
120kV/ 215mAs  
0.50s/7mm/2.0x16  
-46.00mm/r  
HP23.0

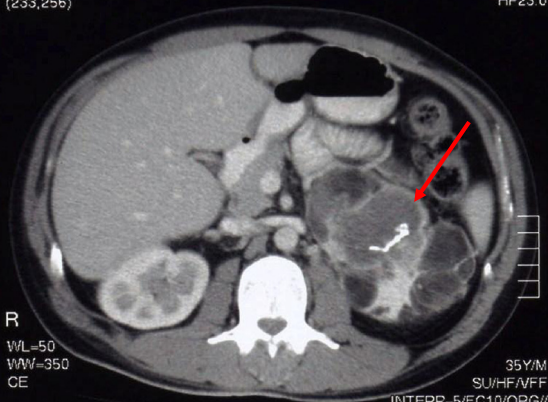

Supplement: MOESM1 [file 9650256]
